# Supplementary material
Source: PubMed Central journal article supplement (PMC5359490)
Supplement: AEM.03374-16_zam999117735s1.pdf [file AEM.03374-16_zam999117735s1.pdf]

## Supplementary material

### **Development of *oriC*-based plasmids for *Mesoplasma florum***

Dominick Matteau<sup>a \*</sup>, Marie-Eve Pepin<sup>a \*</sup>, Vincent Baby<sup>a</sup>, Samuel Gauthier<sup>a</sup>, Mélissa Arango Giraldo<sup>a</sup>, Thomas F. Knight<sup>b</sup>, & Sébastien Rodrigue<sup>a#</sup>.

Département de biologie, Université de Sherbrooke, Sherbrooke, Québec, Canada<sup>a</sup>; Ginkgo Bioworks, Boston, Massachusetts, USA<sup>b</sup>

Running title: *Mesoplasma florum oriC* plasmids

#Address correspondence to Sébastien Rodrigue, [sebastien.rodrigue@usherbrooke.ca](mailto:sebastien.rodrigue@usherbrooke.ca)

\* D.M. and M-E.P. contributed equally to this work.

#### **This file includes**

Supplementary Materials and Methods

Supplementary Figures S1-S4

Supplementary Tables S1-S5

Supplementary References

# Supplementary Materials and Methods

## Plasmids construction

### (i) Molecular biology methods

Genes conferring resistance to tetracycline (*tetM*), puromycin (*pac*), streptomycin and spectinomycin (*aadA1*), chloramphenicol (*cat*), and erythromycin (*ereB*) were recoded using a compromise codon table (Table S2) to obtain functional proteins (GenBank accession numbers: WP\_000691749, AHL28657, WP\_001206315, KLX70575, and WP\_032488343, respectively) in *Escherichia coli* as well as in *Mesoplasma florum*. The *pac*, *aadA1*, and *cat* resistance genes were synthesized in gBlocks fragments (Integrated DNA Technologies), *ereB* resistance gene was obtained from Biobasic's gene synthesis service (*ereB*-pUC57), and *tetM* resistance cassette was amplified from the pTT01 plasmid (Table 3). All PCRs were performed using VeraSeq 2.0 DNA polymerase (Enzymatics) and primers listed in Table S1. PCR conditions were as follows: (i) 30 sec at 95°C; (ii) 30 cycles of 10 sec at 95°C, 30 sec at the appropriate annealing temperature, and 30 sec/kb at 72°C; (iii) 2 min at 72°C. PCR products were purified using Solid Phase Reversible Immobilization (SPRI) bead capture using Agencourt AMPure XP magnetic beads (Beckman Coulter) (1). Wild-type *M. florum* L1 genomic DNA (gDNA) was extracted using the Quick-gDNA MiniPrep kit (Zymo Research) according to the manufacturer's specifications. All plasmids generated in this study were cloned in chemically competent *E. coli* strain EC100D *pir*<sup>+</sup> cells, except for pMflPT-o4 was cloned in *E. coli* strain MM294. Plasmid DNA was extracted using the EZ-10 Spin Column Plasmid DNA Minipreps kit (Biobasic) according to the manufacturer's instructions. Plasmid constructions were analyzed by restriction enzymes digestion, and *M. florum oriC* plasmids sequence was confirmed by paired-end Illumina

sequencing at the Laboratoire de Génomique Fonctionnelle de l'Université de Sherbrooke (QC, Canada). Plasmids sequence and annotations are available at [http://lab-rodrique.recherche.usherbrooke.ca/m\\_florum\\_plasmids/](http://lab-rodrique.recherche.usherbrooke.ca/m_florum_plasmids/).

## (ii) Construction of *M. florum oriC* plasmids

Plasmids and oligonucleotides used in this study are listed in Table 3 and in Table S1, respectively. *M. florum oriC* plasmids were constructed as depicted in Figure 2. The different *M. florum oriC* fragments were all amplified from *M. florum* L1 gDNA. Regions upstream and downstream of *dnaA*, designated *oriC1* and *oriC2* respectively, were amplified using *oriC1-F/oriC1-R* and *oriC2-F/oriC2-R* primer pairs. To build the *oriC3* fragment, *oriC1* and *oriC2* regions containing an overlapping sequence of 40 bp were amplified using *oriC1-F/oriC3-R* and *oriC3-F/oriC2-R* primer pairs. The *oriC3* fragment was then assembled by fusion PCR using flanking primers *oriC1-F/oriC2-R*. *dnaA* gene along with both upstream and downstream regions, designated *oriC4*, was first amplified in four distinct fragments using *oriC1-F/oriC4-1-R*, *oriC4-1-F/oriC4-2-R*, *oriC4-2-F/oriC4-3-R* and *oriC4-3-F/oriC2-R* primer pairs. The complete *oriC4* region was next assembled by fusion PCR using flanking primers *oriC1-F/oriC2-R*. *tetM* resistance cassette containing the pBOT1 promoter from pBOT1 plasmid (2) was amplified from pTT01 using *tetM-F/tetM-R* and *tetM-1-F/tetM-R* primer pairs to build pMfIT-o1 and pMfIT-o3/-o4, respectively. ColE1 replication origin was amplified from pUC19 (GenBank accession number: L09137) using *colE1-F/colE1-R* primers and *oriT<sub>RP4</sub>* was amplified from pSW23T (Genbank accession number: AY733066) using RP4-F/RP4-R primers. The *colE1* and *oriT<sub>RP4</sub>* fragments were then assembled by fusion PCR using *colE1-F/RP4-R* flanking primers. PCR fragments *oriC1*, *oriC3*, and *oriC4* were assembled with the appropriate *tetM*, *colE1*, and

*oriT<sub>RP4</sub>* fragments using the Gibson Assembly Master Mix (New England BioLabs) to build pMflT-o1, pMflT-o3, and pMflT-o4, respectively. To generate pMflT-o2, pMflT-o4 was digested with ClaI, the resulting 3.6 kb band was purified using the Zymoclean Gel DNA Recovery kit (Zymo Research), and the purified fragment was circularized using the T4 DNA ligase.

### **(iii) Construction of *M. florum oriC* plasmids derivatives**

In order to build pMflPT-o4, pMflST-o4, and pMflCT-o4 plasmids (see Fig. 2 and Table 3), pMflT-o4 was linearized using NotI and the corresponding resistance cassette was cloned using the Gibson Assembly Master Mix (New England BioLabs). For pMflPT-o4, pBOT1 promoter was amplified from pTT01 and *pac* resistance gene was amplified from gBlocks fragments using pBOT1-F/pBOT1-R and *pac*-F/*pac*-R primer pairs (Table S1), respectively. To construct the *pac* resistance cassette, pBOT1 and *pac* fragments were assembled by fusion PCR using pBOT1-F/*pac*-R flanking primers. For pMflST-o4, *aadA1* resistance cassette containing P<sub>N25</sub> promoter (3) was amplified from gBlocks fragment using *aadA1*-F/*aadA1*-R primers. For pMflCT-o4, P<sub>N25</sub> promoter and *cat* resistance gene were amplified from gBlocks fragments using P<sub>N25</sub>-F/P<sub>N25</sub>-R and *cat*-F/*cat*-R primer pairs, respectively. The P<sub>N25</sub> and *cat* fragments were assembled by fusion PCR using P<sub>N25</sub>-F/*cat*-R flanking primers to construct the *cat* resistance cassette. pMflET-o4 was constructed by cloning the *ereB* resistance cassette, obtained from *ereB*-pUC57 AscI/XhoI digestion, into a pMflT-o4 derivative plasmid.

### **(iii) Construction of heterologous *oriC* plasmids**

*M. florum* heterologous *oriC* plasmids were constructed as depicted in Figure S4B. pMflT-o4 backbone was amplified using pMfl-F/pMfl-R primer pair (Table S1), digested using

XhoI/PvuI, and dephosphorylated with Antarctic phosphatase (New England BioLabs). Heterologous *dnaA/oriC* regions were amplified from pMCO3 (*Mycoplasma capricolum subsp. capricolum*), pMYSO1 (*Mycoplasma mycoides subsp. mycoides*), pMYCO1 (*M. mycoides subsp. capri*), and pSD4 (*Spiroplasma citri*) plasmids (Table 3 and Fig. S4A) using *Mcap-F/Mcap-R*, *Mm-F/Mmm-R*, *Mm-F/Mmc-R*, and *Sci-F/Sci-R* primers pairs (Table S1), respectively. *OriC* fragments were then digested with XhoI/PvuI and phosphorylated using T4 phosphonucleotide kinase (Enzymatics). To construct pMcapT, pMmmT, pMmcT, and pSciT-o4 (Table 3 and Fig. S4B), pMflT-o4 backbone and the corresponding heterologous *oriC* fragment were ligated using T7 DNA ligase (New England BioLabs).

# Supplementary Figures

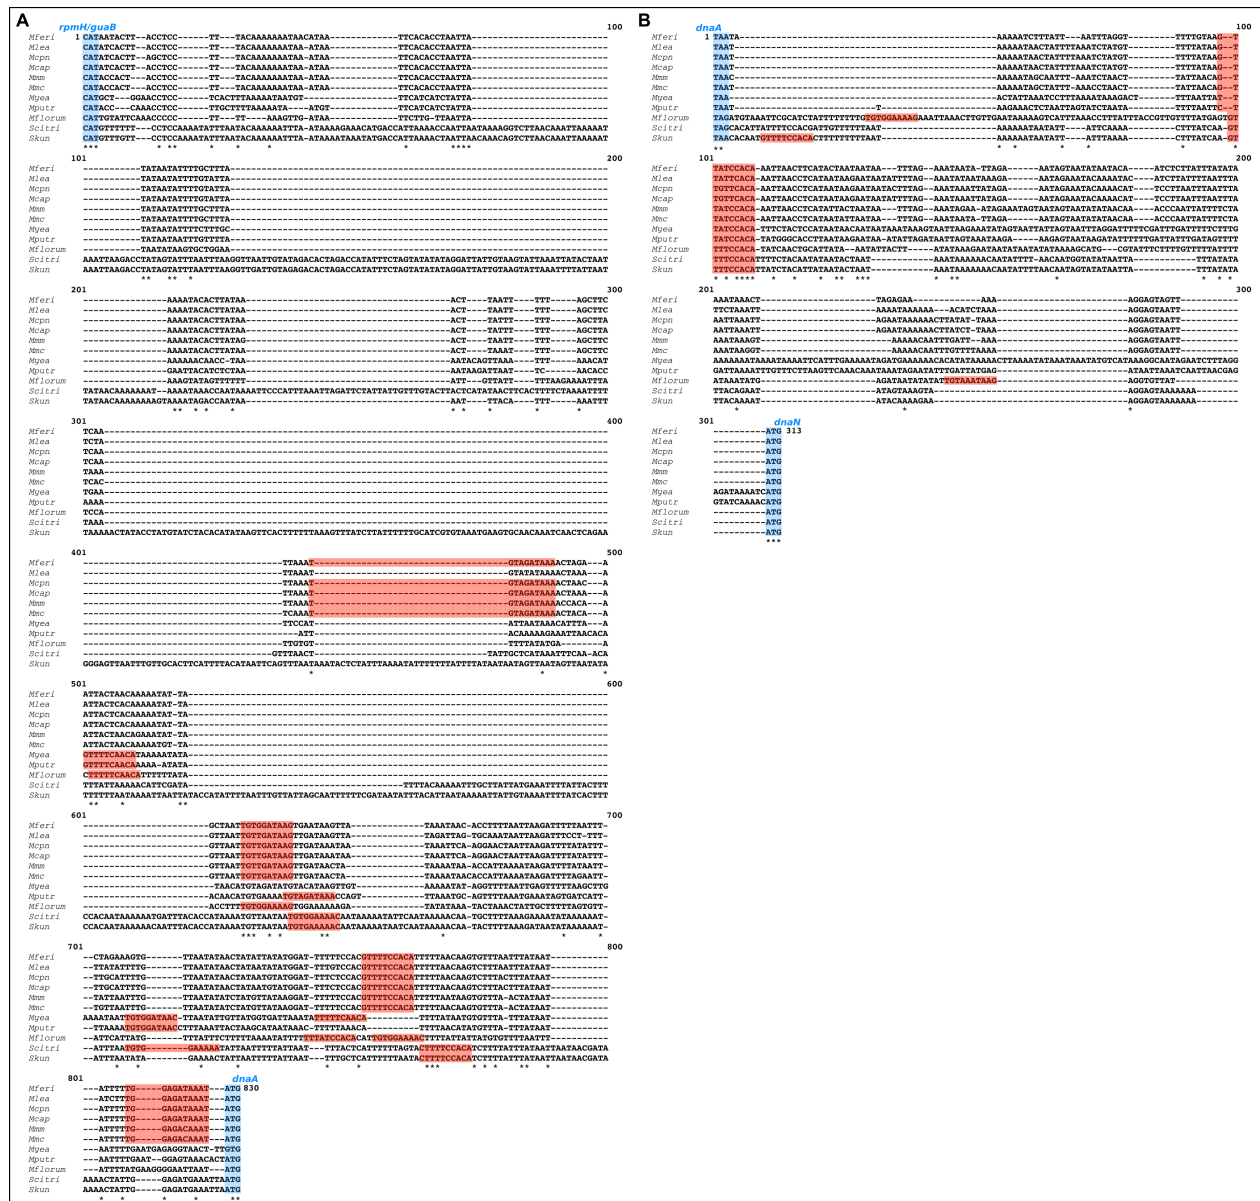

**Fig. S1.** DNA sequence alignment of the intergenic regions upstream (A) and downstream (B) of *dnaA* in selected species of the Spiroplasma group. Start and stop codons of surrounding genes are highlighted in blue, and putative DnaA boxes (see Fig. 1C) are highlighted in red. Perfectly conserved nucleotides are indicated with asterisks. *Mferi*, *Mycoplasma feriruminatoris*; *Mlea*,

*Mycoplasma leachii*; *Mcpn*, *M. capricolum* subsp. *capripneumoniae*; *Mcap*, *M. capricolum* subsp. *capricolum*; *Mmm*, *M. mycoides* subsp. *mycoides*; *Mmc*, *M. mycoides* subsp. *capri*; *Myea*, *Mycoplasma yeatsii*; *Mputr*, *Mycoplasma putrefaciens*; *Mflorum*, *M. florum*; *Scitri*, *S. citri*; *Skun*, *Spiroplasma kunkelii*.

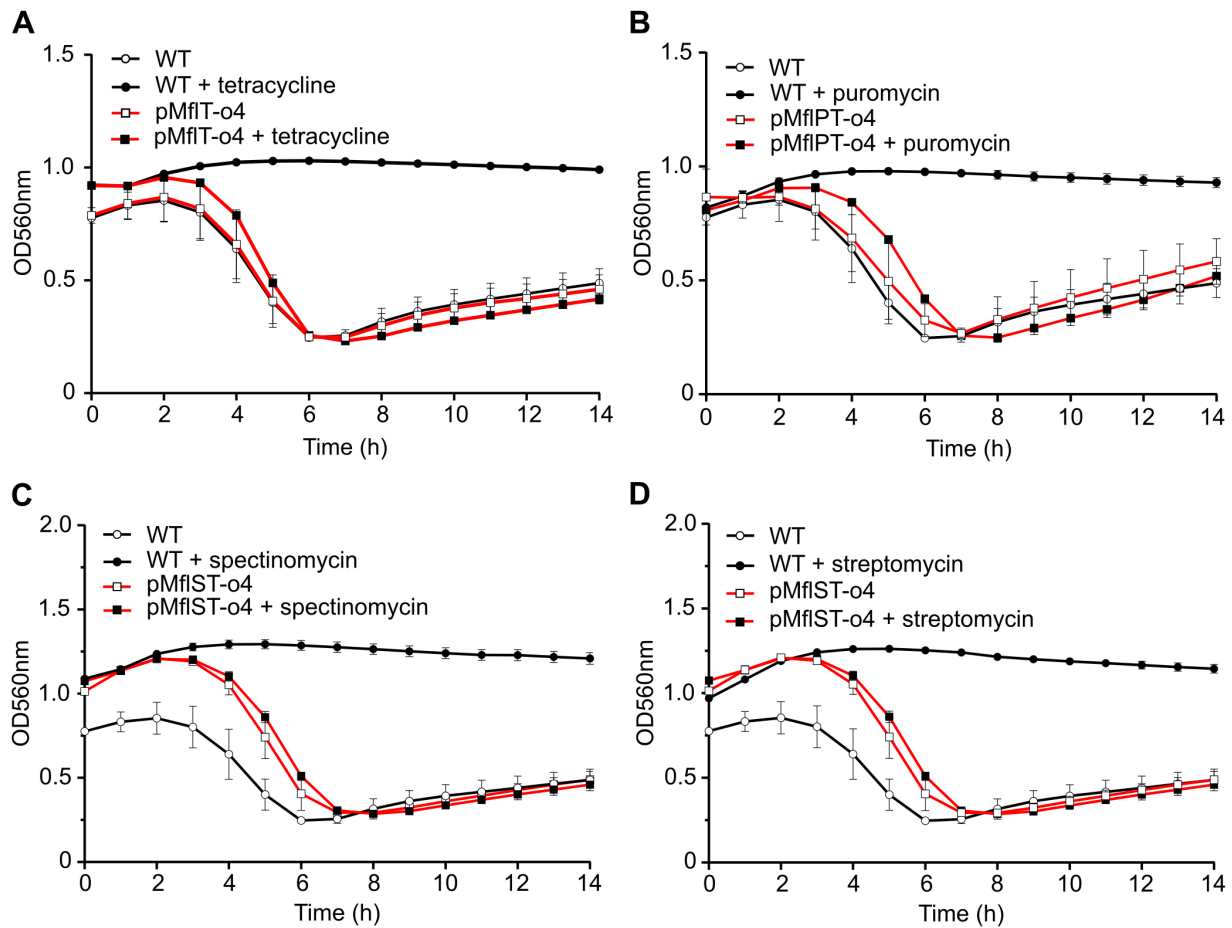

**Fig. S2.** Growth curves of *M. florum* L1 wild-type strain (WT) and *M. florum* L1 carrying pMflT-o4 (A), pMflPT-o4 (B) or pMflST-o4 (C and D) in ATCC 1161 medium with or without the indicated antibiotics. Growth was monitored by a decrease in absorbance of phenol red at 560 nm caused by the acidification of the culture medium that correlates with *M. florum* cell

concentrations (4). Antibiotics were used at the following concentrations: tetracycline, 15  $\mu\text{g/ml}$ ; puromycin, 30  $\mu\text{g/ml}$ ; spectinomycin and streptomycin, 100  $\mu\text{g/ml}$ . Each data point represents the mean and the standard deviation of values obtained from three independent experiments.

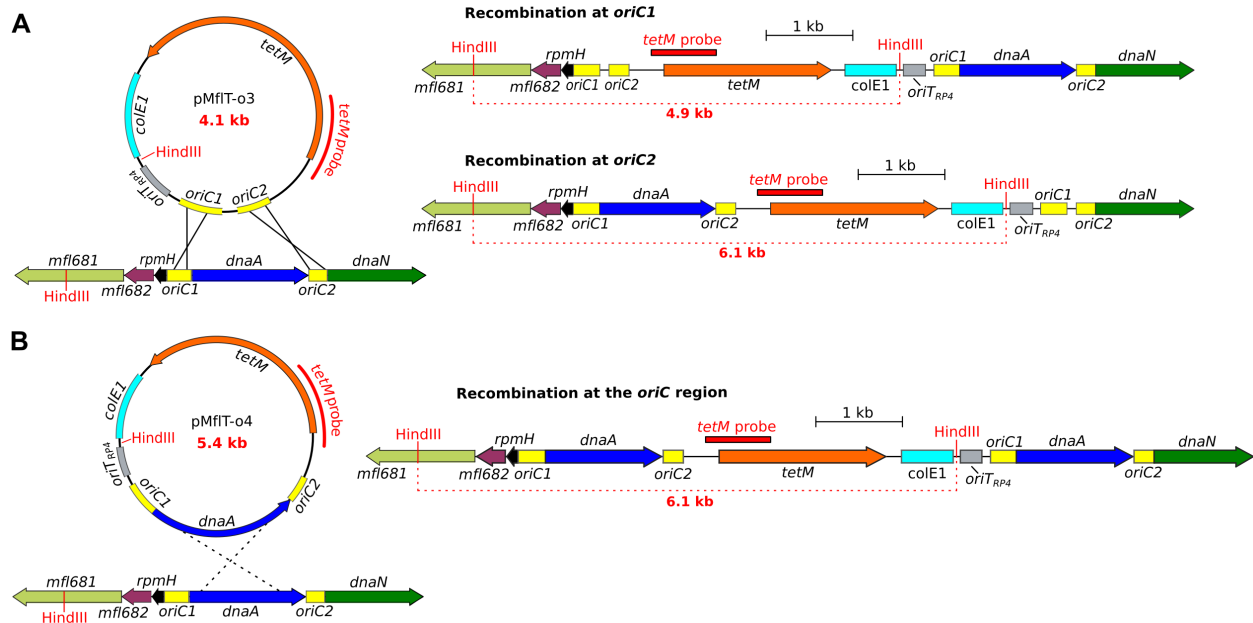

**Fig. S3.** Schematic representation of pMflT-o3 (A) and pMflT-o4 (B) plasmids recombination with the *oriC* region of the *M. florum* chromosome. The localization of HindIII sites and *tetM* probe used for Southern blot analysis are indicated in red, as well as the resulting fragment size.

Genes are drawn to scale.



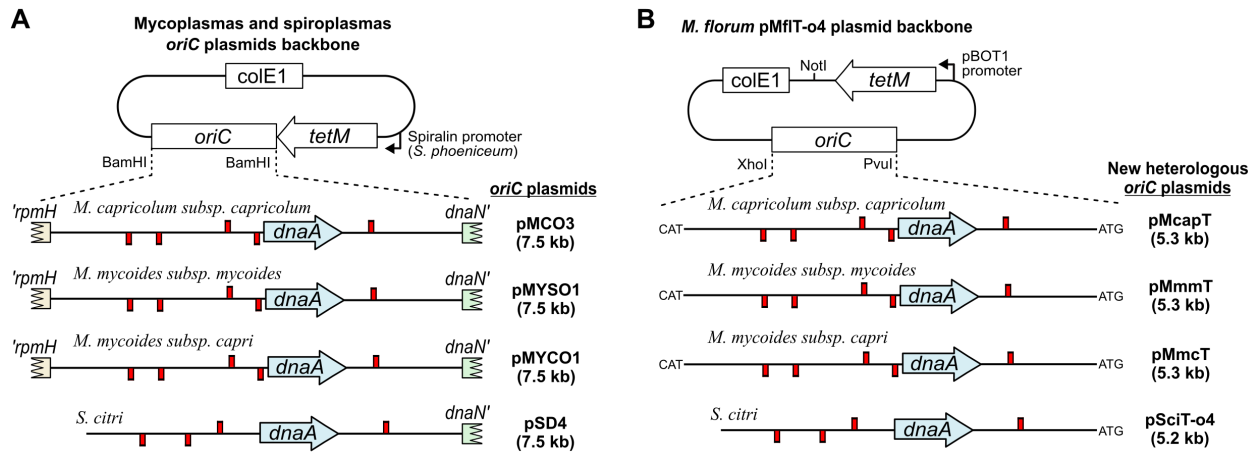

**Fig. S4.** Schematic representation of *M. florum* heterologous *oriC* plasmids. Putative DnaA boxes found within the intergenic regions upstream and downstream of *dnaA* are represented by red boxes as shown in Figure 1C. (A) Principal features of *M. capricolum*, *M. mycoides*, and *S. citri* *oriC* plasmids developed by Lartigue et al. and used in this study (2, 5, 6). (B) Depiction of the new *M. florum* heterologous *oriC* plasmids developed in this study (see Text S1 for construction details). Each plasmid contains a pMfIT-o4 backbone in which the complete *M. florum* *oriC* region was replaced by a heterologous *oriC* region depicted in A.

## Supplementary Tables

**Table S1. Primers used in this study.**

| Name           | Nucleotide sequence (5' to 3')                                |
|----------------|---------------------------------------------------------------|
| <i>oriC1-F</i> | GCGATGAGGATGAACCTACTCAGGGACCTGATGTGACGTGCCGTGAACACGAGCGTGTTT  |
| <i>oriC1-R</i> | ATTAACCCTCACTAAAGGGAGTTTCCATATTAATTCCCCCT                     |
| <i>oriC2-F</i> | GCGATGAGGATGAACCTACTCAGGGACCTGATGTGACGTGGTTTTAAGTGCTATTTTCGCG |
| <i>oriC2-R</i> | ATTAACCCTCACTAAAGGGACTCATATAACACCTCTTATTTAC                   |
| <i>oriC3-R</i> | CGCGAAATAGCACTTAAAACGTTTCCATATTAATTCCCCCT                     |
| <i>oriC3-F</i> | AGGGGAATTAATATGGAACGTTTTAAGTGCTATTTTCGCG                      |

|                          |                                                               |
|--------------------------|---------------------------------------------------------------|
| <i>oriC4-1-R</i>         | CAATATATTCTTCAATAATGTCTTGGTCTATTAATTTTTCTTCTTTAACTTA          |
| <i>oriC4-1-F</i>         | TAAGTTAAAGAAGGAAAAATTAATAGACCAAGACATTATGAAGAATATATTG          |
| <i>oriC4-2-R</i>         | TAAAATAGTTACACCAAGATTACTTCTAACAAGGATTACGAACTCTG               |
| <i>oriC4-2-F</i>         | CAGAGTTCGTAATCCTTGTTAGAAGTAATCTTGGTGTAACATTTTTTA              |
| <i>oriC4-3-R</i>         | CGCGAAATAGCACTTAAAACGTACTATGGTCTCTTCCACCAAATTTGACACC          |
| <i>oriC4-3-F</i>         | GGTGCAGAATTTGGTGGAAGAGACCATAGTACAGTTTAAAGTGCTATTTTCGCG        |
| <i>tetM-F</i>            | AGGGGAATTAATATGGAACTCCCTTTAGTGAGGGTTAAT                       |
| <i>tetM-R</i>            | TATGCATCAGTATCGCATAACGACCATATAGCCCTACCTACTAAATTACCCTGTTATCCC  |
| <i>tetM-1-F</i>          | GTAAATAAGAGGTGTTATATGAGTCCCTTTAGTGAGGGTTAAT                   |
| <i>colE1-F</i>           | TAGGTAGGGCTATATGGTCGTTATGCGATACTGATGCATAAAGGCCGCGTTGCTGGCGTT  |
| <i>colE1-R</i>           | GCTCCAGCTTTTGTTCCTTTAGTGAGGGTTAATTGCGCGTTGAGATCCTTTTTTTCTGC   |
| RP4-F                    | CGCGCAATTAACCCCTACTAAAGGGAACAAAAGCTGGAGCGCTGCAGGAATTCGATATCA  |
| RP4-R                    | CACGTCACATCAGGTCCCTGAGTAGGTTTCATCCTCATCGCTGGGTACCAGCGCTTTTCCG |
| pBOT1-F                  | CGTTATATGTTCAACAAAATCACATAATAATACTAGTAGCTCCCTTTAGTGAGGGTTAAT  |
| pBOT1-R                  | GTTGGTTTGTATTCAGTCATCTAGATTTCTCCATTCAA                        |
| pBOT2-F                  | GTCGTGACTGGGAAAACCCT                                          |
| <i>tetM-probe-R</i>      | TCCGTTTTGGTCAATTTTGT                                          |
| <i>pac-F</i>             | TTTGAATGGAGGAAATCTAGATGACTGAATACAAACCAAC                      |
| <i>pac-R</i>             | CCTAAATCGTATGCCCTATAGTGAGTCGTATTACTGCAGCTTATGCACCTGGTTTTCTTG  |
| <i>aadA1-F</i>           | CAAGAAAACCAGGTGCATAATCCCTTTAGTGAGGGTTAAT                      |
| <i>aadA1-R</i>           | ATTAACCCCTCACTAAAGGGATTATGCACCTGGTTTTCTTG                     |
| <i>P<sub>N25</sub>-F</i> | CGTTATATGTTCAACAAAATCACATAATAATACTAGTAGCTCATAAAAAATTTATTTGCT  |
| <i>P<sub>N25</sub>-R</i> | CATCTAGATTTCTCCATATAGT                                        |
| <i>cat-F</i>             | GATTCATACGACTCACTATATGGAGGAAATCTAGATGGAAAAAAGATAACTGGGTACAC   |
| <i>cat-R</i>             | CCTAAATCGTATGCCCTATAGTGAGTCGTATTACTGCAGCTCGAGTTAAGCTCCACCTTG  |
| qPCR- <i>tetM-F</i>      | TGACCGTGCATATTCAGGTG                                          |
| qPCR- <i>tetM-R</i>      | TCACGTTGTTTCAGGTTTGCT                                         |
| qPCR- <i>rpoB-F</i>      | CATGGCTGAAGCTGGAATGGAAAACATATGG                               |
| qPCR- <i>rpoB-R</i>      | CGTTGTCCCCGTTTTGTGC                                           |
| qPCR- <i>rpoC-F</i>      | CCTAAAGATGGAAAAGCGATTG                                        |
| qPCR- <i>rpoC-R</i>      | TCAACTGCAATCCCAATAACTG                                        |

|                |                                                              |
|----------------|--------------------------------------------------------------|
| pMfl-F         | CTTATCTTAAAAGGAGTAATTATGCGATCGTCCCTTTAGTGAGGGTTAATGTCGTGACTG |
| pMfl-R         | ATTTTTTTGTAAAGGAGTAAGTGATATGCTCGAGCACGTCACATCAGGTCCCTGAGTAG  |
| <i>Mcap</i> -F | CCTGATGTGACGTGCTCGAGCATATCACTTACCTCCTTTACAAAAAATAAATAATTAC   |
| <i>Mcap</i> -R | ATTAACCCTCACTAAAGGGACGATCGCATAATTACTCCTTTTAAGATAAGTTTTTTATTC |
| <i>Mm</i> -F   | TACTCAGGGACCTGATGTGACGTGCTCGAGCATAACCACTACCTCCTTTACAAAAAATAA |
| <i>Mmm</i> -R  | CATTAACCCTCACTAAAGGGACGATCGCATAATTACTCCTTTTAATCAAATTGTTTTTAC |
| <i>Mmc</i> -R  | CGACATTAACCCTCACTAAAGGGACGATCGCATAATTACTCCTTTTTTAAAACAAATTGT |
| <i>Sci</i> -F  | TACTCAGGGACCTGATGTGACGTGCTCGAGTCGATATTTTACAAAAATTTGCTTATTATG |
| <i>Sci</i> -R  | CATTAACCCTCACTAAAGGGACGATCGCATTTTTTTTTACTCCTTACTTTAGTATATCTG |

**Table S2. Compromise codon table for *M. florum* and *E. coli*.**

| Amino acid | Codon | Number in <i>M. florum</i> | Number / 1000 codons | <i>M. florum</i> Probability | <i>E. coli</i> Probability | Compromise probability <sup>a</sup> |
|------------|-------|----------------------------|----------------------|------------------------------|----------------------------|-------------------------------------|
| Gly        | GGG   | 848                        | 3.45                 | 0.06                         | .15                        | .12                                 |
| Gly        | GGA   | 5717                       | 23.26                | 0.43                         | .11                        | .26                                 |
| Gly        | GGT   | 6147                       | 25.01                | 0.47                         | .34                        | .49                                 |
| Gly        | GGC   | 461                        | 1.88                 | 0.03                         | .40                        | .13                                 |
| Glu        | GAG   | 1543                       | 6.28                 | 0.09                         | .31                        | .17                                 |
| Glu        | GAA   | 16303                      | 66.34                | 0.91                         | .69                        | .83                                 |
| Asp        | GAT   | 10918                      | 44.43                | 0.83                         | .63                        | .74                                 |
| Asp        | GAC   | 2203                       | 8.96                 | 0.17                         | .37                        | .26                                 |
| Val        | GTG   | 632                        | 2.57                 | 0.04                         | .37                        | .15                                 |
| Val        | GTA   | 4237                       | 17.24                | 0.28                         | .15                        | .25                                 |
| Val        | GTT   | 9660                       | 39.31                | 0.65                         | .26                        | .52                                 |
| Val        | GTC   | 344                        | 1.40                 | 0.02                         | .22                        | .08                                 |
| Ala        | GCG   | 519                        | 2.11                 | 0.04                         | .36                        | .15                                 |
| Ala        | GCA   | 6198                       | 25.22                | 0.46                         | .21                        | .38                                 |
| Ala        | GCT   | 6297                       | 25.62                | 0.47                         | .16                        | .34                                 |
| Ala        | GCC   | 522                        | 2.12                 | 0.04                         | .27                        | .13                                 |
| Arg        | AGG   | 194                        | 0.79                 | 0.03                         | .02                        | .05                                 |
| Arg        | AGA   | 5448                       | 22.17                | 0.80                         | .04                        | .33                                 |
| Ser        | AGT   | 3752                       | 15.27                | 0.23                         | .15                        | .23                                 |
| Ser        | AGC   | 935                        | 3.80                 | 0.06                         | .28                        | .16                                 |
| Lys        | AAG   | 2110                       | 8.59                 | 0.09                         | .23                        | .15                                 |
| Lys        | AAA   | 21721                      | 88.38                | 0.91                         | .77                        | .85                                 |
| Asn        | AAT   | 13612                      | 55.39                | 0.77                         | .45                        | .62                                 |
| Asn        | AAC   | 4161                       | 16.93                | 0.23                         | .55                        | .38                                 |
| Met        | ATG   | 5660                       | 23.03                | 1.00                         | 1.00                       | 1.00                                |

---

|     |     |       |       |      |      |      |
|-----|-----|-------|-------|------|------|------|
| Ile | ATA | 7748  | 31.53 | 0.32 | .07  | .17  |
| Ile | ATT | 14701 | 59.82 | 0.60 | .51  | .62  |
| Ile | ATC | 1968  | 8.01  | 0.08 | .42  | .21  |
| Thr | ACG | 211   | 0.86  | 0.02 | .27  | .10  |
| Thr | ACA | 7243  | 29.47 | 0.55 | .13  | .38  |
| Thr | ACT | 5558  | 22.62 | 0.42 | .17  | .38  |
| Thr | ACC | 274   | 1.11  | 0.02 | .44  | .14  |
| Trp | TGG | 101   | 0.41  | 0.04 | 1.00 | 1.00 |
| Trp | TGA | 2489  | 10.13 | 0.96 | 0.0  | 0.0  |
| Cys | TGT | 1275  | 5.19  | 0.85 | .45  | .68  |
| Cys | TGC | 228   | 0.93  | 0.15 | .55  | .32  |
| End | TAG | 132   | 0.54  | 0.19 | .07  | .14  |
| End | TAA | 551   | 2.24  | 0.81 | .64  | .86  |
| Tyr | TAT | 7191  | 29.26 | 0.78 | .57  | .68  |
| Tyr | TAC | 1972  | 8.02  | 0.22 | .43  | .32  |
| Leu | TTG | 1765  | 7.18  | 0.08 | .13  | .16  |
| Leu | TTA | 15736 | 64.03 | 0.71 | .13  | .49  |
| Phe | TTT | 10293 | 41.88 | 0.81 | .57  | .70  |
| Phe | TTC | 2391  | 9.73  | 0.19 | .43  | .30  |
| Ser | TCG | 206   | 0.84  | 0.01 | .16  | .05  |
| Ser | TCA | 7413  | 30.16 | 0.46 | .12  | .29  |
| Ser | TCT | 3585  | 14.59 | 0.22 | .15  | .22  |
| Ser | TCC | 92    | 0.37  | 0.01 | .15  | .05  |
| Arg | CGG | 6     | 0.02  | 0.00 | .10  | 0.0  |
| Arg | CGA | 128   | 0.52  | 0.02 | .06  | .06  |
| Arg | CGT | 998   | 4.06  | 0.15 | .38  | .44  |
| Arg | CGC | 67    | 0.27  | 0.01 | .40  | .12  |
| Gln | CAG | 404   | 1.64  | 0.05 | .65  | .24  |
| Gln | CAA | 7058  | 28.72 | 0.95 | .35  | .76  |
| His | CAT | 2211  | 9.00  | 0.73 | .57  | .65  |
| His | CAC | 836   | 3.40  | 0.27 | .43  | .35  |
| Leu | CTG | 182   | 0.74  | 0.01 | .50  | .11  |
| Leu | CTA | 1690  | 6.88  | 0.08 | .04  | .08  |
| Leu | CTT | 2682  | 10.91 | 0.12 | .10  | .17  |
| Leu | CTC | 52    | 0.21  | 0.00 | .10  | 0.0  |
| Pro | CCG | 203   | 0.83  | 0.03 | .52  | .16  |
| Pro | CCA | 3516  | 14.31 | 0.57 | .19  | .44  |
| Pro | CCT | 2306  | 9.38  | 0.37 | .16  | .32  |
| Pro | CCC | 157   | 0.64  | 0.03 | .12  | .08  |

---

<sup>a</sup>The compromise probability is calculated by taking the geometric mean of the two genome codon probabilities and renormalizing such that the sum of probabilities of each codon for a specific amino acid is unity.

**Table S3. *E. coli* and *M. florum* mating ratios for pMflT-o4 conjugation.**

| <i>E. coli</i> MFDpir       |           |                   | <i>M. florum</i> L1         |           |                 | Mating volume ratio<br>( <i>M. florum</i> / <i>E. coli</i> ) |
|-----------------------------|-----------|-------------------|-----------------------------|-----------|-----------------|--------------------------------------------------------------|
| Volume <sup>a</sup><br>(ml) | Dilution  | Approx.<br>CFU    | Volume <sup>b</sup><br>(ml) | Dilution  | Approx.<br>CFU  |                                                              |
| 1                           | undiluted | $2.5 \times 10^7$ | 1                           | undiluted | $5 \times 10^9$ | $10^0$                                                       |
| 1                           | undiluted | $2.5 \times 10^7$ | 0.1                         | undiluted | $5 \times 10^8$ | $10^{-1}$                                                    |
| 1                           | undiluted | $2.5 \times 10^7$ | 0.01                        | undiluted | $5 \times 10^7$ | $10^{-2}$                                                    |
| 1                           | undiluted | $2.5 \times 10^7$ | 0.01                        | $10^{-1}$ | $5 \times 10^6$ | $10^{-3}$                                                    |
| 1                           | undiluted | $2.5 \times 10^7$ | 0.01                        | $10^{-2}$ | $5 \times 10^5$ | $10^{-4}$                                                    |
| 1                           | undiluted | $2.5 \times 10^7$ | -                           | -         | -               | No recipient control                                         |
| -                           | -         | -                 | 1                           | undiluted | $5 \times 10^9$ | No donor control                                             |
| -                           | -         | -                 | 1                           | undiluted | $5 \times 10^9$ | Purified plasmid control<br>(1 $\mu$ g of pMflT-o4)          |

<sup>a</sup>Washed *E. coli* cells from a  $\sim 2.5 \times 10^7$  CFU/ml culture.

<sup>b</sup>Washed *M. florum* cells from a  $\sim 5 \times 10^9$  CFU/ml culture.

**Table S4. *OriC* region percentage identity matrix of selected species of the Spiroplasma group.**

| Species        | <i>Mferi</i> | <i>Mlea</i> | <i>Mcpn</i> | <i>Mcap</i> | <i>Mmm</i> | <i>Mmc</i> | <i>Myea</i> | <i>Mputr</i> | <i>Mflorum</i> | <i>Scitri</i> | <i>Skun</i> |
|----------------|--------------|-------------|-------------|-------------|------------|------------|-------------|--------------|----------------|---------------|-------------|
| <i>Mferi</i>   | 100%         | 90%         | 90%         | 90%         | 90%        | 90%        | 74%         | 73%          | 64%            | 62%           | 62%         |
| <i>Mlea</i>    |              | 100%        | 94%         | 94%         | 91%        | 91%        | 73%         | 72%          | 63%            | 62%           | 62%         |
| <i>Mcpn</i>    |              |             | 100%        | 98%         | 91%        | 92%        | 73%         | 72%          | 64%            | 62%           | 62%         |
| <i>Mcap</i>    |              |             |             | 100%        | 92%        | 92%        | 73%         | 72%          | 63%            | 62%           | 63%         |
| <i>Mmm</i>     |              |             |             |             | 100%       | 97%        | 72%         | 72%          | 62%            | 62%           | 62%         |
| <i>Mmc</i>     |              |             |             |             |            | 100%       | 72%         | 73%          | 62%            | 62%           | 62%         |
| <i>Myea</i>    |              |             |             |             |            |            | 100%        | 74%          | 61%            | 59%           | 60%         |
| <i>Mputr</i>   |              |             |             |             |            |            |             | 100%         | 61%            | 59%           | 59%         |
| <i>Mflorum</i> |              |             |             |             |            |            |             |              | 100%           | 57%           | 57%         |
| <i>Scitri</i>  |              |             |             |             |            |            |             |              |                | 100%          | 94%         |
| <i>Skun</i>    |              |             |             |             |            |            |             |              |                |               | 100%        |

*Mferi*, *M. feriruminatoris*; *Mlea*, *M. leachii*; *Mcpn*, *M. capricolum* subsp. *capripneumoniae*; *Mcap*, *M. capricolum* subsp. *capricolum*; *Mmm*, *M. mycooides* subsp. *mycooides*; *Mmc*, *M. mycooides* subsp. *capri*; *Myea*, *M. yeatsii*; *Mputr*, *M. putrefaciens*; *Mflorum*, *M. florum*; *Scitri*, *S. citri*; *Skun*, *S. kunkelii*.

**Table S5. Putative DnaA boxes found within the *oriC* intergenic regions of selected species of the Spiroplasma group.**

| DnaA box sequence                                  | Strand | <i>p</i> -value | Genomic position (bp) | Position relative to <i>dnaA</i> start codon (bp) |
|----------------------------------------------------|--------|-----------------|-----------------------|---------------------------------------------------|
| <i>M. feriruminatoris</i>                          |        |                 |                       |                                                   |
| <i>rpmH/dnaA</i>                                   |        |                 |                       |                                                   |
| TTTATCTACA                                         | -      | 4.8E-5          | 4,332 – 4,341         | (-182) – (-191)                                   |
| CTTATCCACA                                         | -      | 6.0E-6          | 4,374 – 4,383         | (-140) – (-149)                                   |
| GTTTTCCACA                                         | +      | 2.2E-6          | 4,471 – 4,480         | (-43) – (-52)                                     |
| TTTATCTCCA                                         | -      | 6.3E-5          | 4,512 – 4,521         | (-2) – (-11)                                      |
| <i>dnaA/dnaN</i>                                   |        |                 |                       |                                                   |
| GTTATCCACA                                         | +      | 1.1E-6          | 5,908 – 5,917         | 1,386 – 1,395                                     |
| <i>M. leachii</i>                                  |        |                 |                       |                                                   |
| <i>rpmH/dnaA</i>                                   |        |                 |                       |                                                   |
| CTTATCAACA                                         | -      | 3.4E-5          | 79 – 88               | (-139) – (-148)                                   |
| GTTTTCCACA                                         | +      | 2.2E-6          | 175 – 184             | (-43) – (-52)                                     |
| TTTATCTCCA                                         | -      | 6.3E-5          | 216 – 225             | (-2) – (-11)                                      |
| <i>dnaA/dnaN</i>                                   |        |                 |                       |                                                   |
| GTTATTCACA                                         | +      | 4.2E-5          | 1,614 – 1,623         | 1,388 – 1,397                                     |
| <i>M. capricolum</i> subsp. <i>capripneumoniae</i> |        |                 |                       |                                                   |
| <i>rpmH/dnaA</i>                                   |        |                 |                       |                                                   |

|                                                |   |        |                       |                 |
|------------------------------------------------|---|--------|-----------------------|-----------------|
| TTTATCTACA                                     | - | 4.8E-5 | 1,017,103 – 1,017,112 | (-182) – (-191) |
| CTTATCAACA                                     | - | 3.4E-5 | 1,017,145 – 1,017,154 | (-140) – (-149) |
| GTTTTCCACA                                     | + | 2.2E-6 | 1,017,242 – 1,017,251 | (-43) – (-52)   |
| TTTATCTCCA                                     | - | 6.3E-5 | 1,017,283 – 1,017,292 | (-2) – (-11)    |
| <i>dnaA/dnaN</i>                               |   |        |                       |                 |
| GTTGTTTCCACA                                   | + | 5.6E-5 | 1,388 – 1,397         | 1,388 – 1,397   |
| <i>M. capricolum subsp. capricolum</i>         |   |        |                       |                 |
| <i>rpmH/dnaA</i>                               |   |        |                       |                 |
| TTTATCTACA                                     | - | 4.8E-5 | 1,009,833 – 1,009,842 | (-182) – (-191) |
| CTTATCAACA                                     | - | 3.4E-5 | 1,009,875 – 1,009,884 | (-140) – (-149) |
| GTTTTCCACA                                     | + | 2.2E-6 | 1,009,972 – 1,009,981 | (-43) – (-52)   |
| TTTATCTCCA                                     | - | 6.3E-5 | 1,010,013 – 1,010,022 | (-2) – (-11)    |
| <i>dnaA/dnaN</i>                               |   |        |                       |                 |
| GTTGTTTCCACA                                   | + | 5.6E-5 | 1,388 – 1,397         | 1,388 – 1,397   |
| <i>M. mycoides subsp. mycoides<sup>a</sup></i> |   |        |                       |                 |
| <i>rpmH/dnaA</i>                               |   |        |                       |                 |
| TTTATCTACA                                     | - | 4.8E-5 | 1,211,602 – 1,211,611 | (-180) – (-189) |
| CTTATCAACA                                     | - | 3.4E-5 | 1,211,644 – 1,211,653 | (-138) – (-147) |
| GTTTTCCACA                                     | + | 2.2E-6 | 37 – 46               | (-42) – (-51)   |
| TTTGTCTCCA                                     | - | 7.4E-5 | 77 – 86               | (-2) – (-11)    |
| <i>dnaA/dnaN</i>                               |   |        |                       |                 |
| GTTATCCACA                                     | + | 1.1E-6 | 1,474 – 1,483         | 1,387 – 1,396   |
| <i>M. mycoides subsp. capri</i>                |   |        |                       |                 |
| <i>rpmH/dnaA</i>                               |   |        |                       |                 |
| TTTATCTACA                                     | - | 4.8E-5 | 1,078,118 – 1,078,127 | (-181) – (-190) |
| CTTATCAACA                                     | - | 3.4E-5 | 1,078,160 – 1,078,169 | (-139) – (-148) |
| GTTTTCCACA                                     | + | 2.2E-6 | 1,078,257 – 1,078,266 | (-42) – (-51)   |
| TTTGTCTCCA                                     | - | 7.4E-5 | 1,078,297 – 1,078,306 | (-2) – (-11)    |
| <i>dnaA/dnaN</i>                               |   |        |                       |                 |
| GTTATCCACA                                     | + | 1.1E-6 | 1,387 – 1,396         | 1,387 – 1,396   |
| <i>M. yeatsii<sup>b</sup></i>                  |   |        |                       |                 |
| <i>rpmH/dnaA</i>                               |   |        |                       |                 |
| GTTTTCAACA                                     | + | 2.3E-5 | 894,886 – 894,895     | (-172) – (-181) |
| GTTATCCACA                                     | - | 1.1E-6 | 894,975 – 894,984     | (-83) – (-92)   |
| TTTTTCAACA                                     | + | 5.6E-5 | 895,010 – 895,019     | (-48) – (-57)   |
| <i>dnaA/dnaN</i>                               |   |        |                       |                 |
| TTTATCCACA                                     | + | 1.2E-5 | 1,425 – 1,434         | 1,410 – 1,419   |
| <i>M. putrefaciens</i>                         |   |        |                       |                 |
| <i>rpmH/dnaA</i>                               |   |        |                       |                 |
| GTTTTCAACA                                     | + | 2.3E-5 | 832,426 – 832,435     | (-169) – (-178) |
| TTTATCTACA                                     | - | 4.8E-5 | 832,459 – 832,468     | (-136) – (-145) |
| GTTATCCACA                                     | - | 1.1E-6 | 832,513 – 832,522     | (-82) – (-91)   |
| <i>dnaA/dnaN</i>                               |   |        |                       |                 |
| CTTATCCACA                                     | + | 6.0E-6 | 1,392 – 1,401         | 1,392 – 1,401   |
| <i>M. florum</i>                               |   |        |                       |                 |
| <i>rpmH/dnaA</i>                               |   |        |                       |                 |
| TTTTTCAACA                                     | + | 5.6E-5 | 793,045 – 793,054     | (-171) – (-180) |
| CTTTTCCACA                                     | - | 7.1E-6 | 793,070 – 793,079     | (-146) – (-155) |
| TTTATCCACA                                     | + | 1.2E-5 | 793,157 – 793,166     | (-59) – (-68)   |
| GTTTTCCACA                                     | - | 2.2E-6 | 793,170 – 793,179     | (-46) – (-55)   |

|                    |   |        |                       |                 |
|--------------------|---|--------|-----------------------|-----------------|
| <i>dnaA/dnaN</i>   |   |        |                       |                 |
| CTTTTCCACA         | - | 7.1E-6 | 1,359 – 1,368         | 1,359 – 1,368   |
| GTTTTCCACA         | + | 2.2E-6 | 1,428 – 1,437         | 1,428 – 1,437   |
| CTTATTTACA         | - | 9.6E-5 | 1,541 – 1,550         | 1,541 – 1,550   |
| <i>S. citri</i>    |   |        |                       |                 |
| <i>guaB/dnaA</i>   |   |        |                       |                 |
| GTTTTCCACA         | - | 2.2E-6 | 52,010 – 52,019       | (-159) – (-168) |
| TTTTTCCACA         | - | 1.3E-5 | 52,075 – 52,084       | (-94) – (-103)  |
| CTTTTCCACA         | + | 7.1E-6 | 52,120 – 52,129       | (-49) – (-58)   |
| <i>dnaA/dnaN</i>   |   |        |                       |                 |
| GTTTTCCACA         | + | 2.2E-6 | 1,413 – 1,422         | 1,413 – 1,422   |
| <i>S. kunkelii</i> |   |        |                       |                 |
| <i>guaB/dnaA</i>   |   |        |                       |                 |
| GTTTTTCCACA        | - | 4.5E-5 | 1,463,816 – 1,463,825 | (-159) – (-168) |
| CTTTTCCACA         | + | 7.1E-6 | 1,463,926 – 9         | (-49) – (-58)   |
| <i>dnaA/dnaN</i>   |   |        |                       |                 |
| GTTTTCCACA         | + | 2.2E-6 | 1,417 – 1,426         | 1,360 – 1,369   |
| GTTTTCCACA         | + | 2.2E-6 | 1,470 – 1,479         | 1,413 – 1,422   |

<sup>a</sup>According to multiple DNA sequence alignment, protein blast, and absence of putative Shine-Dalgarno sequence, the start codon of *dnaA* was considered to be located at position 88 bp instead of position 1 bp, and the start codon of *rpmH* was considered to be located at position 1,211,498 bp instead of 1,211,534 bp, relatively to the available Genbank sequence (RefSeq NC\_005364.2).

<sup>b</sup>According to multiple DNA sequence alignment, protein blast, and absence of putative Shine-Dalgarno sequence, the start codon of *dnaA* was considered to be located at position 16 bp instead of position 1 bp, relatively to the available Genbank sequence (RefSeq NZ\_CP007520.1).

## Supplementary References

1. **Rodrigue S, Materna AC, Timberlake SC, Blackburn MC, Malmstrom RR, Alm EJ, Chisholm SW.** 2010. Unlocking Short Read Sequencing for Metagenomics. *PLoS One* **5**:e11840.
2. **Renaudin J, Marais A, Verdin E, Duret S, Foissac X, Laigret F, Bové JM.** 1995. Integrative and free *Spiroplasma citri* *oriC* plasmids: Expression of the *Spiroplasma phoeniceum* spiralin in *Spiroplasma citri*. *J Bacteriol* **177**:2870–2877.
3. **Brunner M, Bujard H.** 1987. Promoter recognition and promoter strength in the *Escherichia coli* system. *EMBO J* **6**:3139–3144.
4. **Matteau D, Baby V, Pelletier S, Rodrigue S.** 2015. A Small-Volume, Low-Cost, and Versatile Continuous Culture Device. *PLoS One* **10**:e0133384.
5. **Lartigue C, Blanchard A, Renaudin J, Thiaucourt F, Sirand-Pugnet P.** 2003. Host specificity of mollicutes *oriC* plasmids: Functional analysis of replication origin. *Nucleic Acids Res* **31**:6610–6618.
6. **Lartigue C, Duret S, Garnier M, Renaudin J.** 2002. New plasmid vectors for specific gene targeting in *Spiroplasma citri*. *Plasmid* **48**:149–159.
